# Supplementary material
Source: Copernicus journal article supplement (doi:10.5194/essd-2026-295)
Supplement: Supplementary file 1 [file essd-2026-295-supplement.pdf]

# Supplementary Materials

## 1 Information on proxy records used in this study

A total of 423 historical climate proxy records were initially collected from publicly available peer-reviewed papers and monographs. Following a rigorous quality control process, 119 proxy records were finally selected for this study. Detailed information regarding these selected proxy records, including their latitude, longitude, start year, end year, type, and data source, is provided in Tab. S1.

**Table S1: Information on proxy records used in this study**

| No. | Latitude(°N) | Longitude(°E) | Start Year | End Year | Type        | Data source                            |
|-----|--------------|---------------|------------|----------|-------------|----------------------------------------|
| 1   | 50.08        | 87.77         | 1495       | 1998     | Tree ring   | Panyushkina et al. (2005) <sup>1</sup> |
| 2   | 50.12        | 87.92         | 1554       | 2000     | Tree ring   | Magda et al. (2012) <sup>2</sup>       |
| 3   | 33.75        | 107.80        | 1600       | 1992     | Tree ring   | Cook et al. (2013) <sup>3</sup>        |
| 4   | 27.45        | 90.15         | 1456       | 2005     | Tree ring   | Cook et al. (2010) <sup>4</sup>        |
| 5   | 27.95        | 89.75         | 1453       | 2006     | Tree ring   | Cook et al. (2010) <sup>4</sup>        |
| 6   | 29.28        | 100.08        | 1540       | 2006     | Tree ring   | Cook et al. (2010) <sup>4</sup>        |
| 7   | 30.23        | 100.27        | 1306       | 2007     | Tree ring   | Cook et al. (2010) <sup>4</sup>        |
| 8   | 28.98        | 99.93         | 1380       | 2007     | Tree ring   | Cook et al. (2010) <sup>4</sup>        |
| 9   | 27.62        | 99.80         | 1516       | 2007     | Tree ring   | Cook et al. (2010) <sup>4</sup>        |
| 10  | 29.30        | 91.97         | 1217       | 1998     | Tree ring   | Cook et al. (2013) <sup>3</sup>        |
| 11  | 31.12        | 97.03         | 1406       | 1994     | Tree ring   | Cook et al. (2013) <sup>3</sup>        |
| 12  | 34.47        | 110.08        | 1359       | 2005     | Tree ring   | Cook et al. (2013) <sup>3</sup>        |
| 13  | 28.38        | 85.72         | 1450       | 1996     | Glacier Ice | Thompson et al. (2000) <sup>5</sup>    |
| 14  | 28.38        | 85.72         | 1450       | 1996     | Glacier Ice | Thompson et al. (2000) <sup>5</sup>    |
| 15  | 34.75        | 100.82        | 1287       | 2004     | Tree ring   | Cook et al. (2013) <sup>4</sup>        |
| 16  | 30.98        | 78.93         | 1567       | 1999     | Tree ring   | Cook et al. (2013) <sup>4</sup>        |
| 17  | 34.73        | 100.80        | 1346       | 2004     | Tree ring   | Cook et al. (2013) <sup>4</sup>        |
| 18  | 34.78        | 100.82        | 1520       | 2002     | Tree ring   | Cook et al. (2013) <sup>4</sup>        |
| 19  | 34.73        | 100.78        | 1475       | 2004     | Tree ring   | Cook et al. (2013) <sup>4</sup>        |
| 20  | 43.18        | 87.18         | 1543       | 1993     | Tree ring   | Cook et al. (2013) <sup>4</sup>        |
| 21  | 31.37        | 78.17         | 1538       | 2004     | Tree ring   | Cook et al. (2013) <sup>4</sup>        |
| 22  | 44.35        | 142.18        | 1575       | 1999     | Tree ring   | Yasue et al. (1999) <sup>7</sup>       |
| 23  | 43.22        | 145.47        | 1511       | 1998     | Tree ring   | Cook et al. (2013) <sup>3</sup>        |
| 24  | 43.955       | 145.725       | 1585       | 2000     | Tree ring   | Demezhko&Solomina (2009) <sup>6</sup>  |
| 25  | 43.955       | 145.725       | 1585       | 2000     | Tree ring   | Demezhko&Solomina (2009) <sup>6</sup>  |
| 26  | 40.17        | 72.58         | 1378       | 1995     | Tree ring   | Cook et al. (2013) <sup>3</sup>        |
| 27  | 40.20        | 72.58         | 1420       | 1995     | Tree ring   | Cook et al. (2013) <sup>3</sup>        |
| 28  | 42.15        | 79.47         | 1301       | 2005     | Tree ring   | Cook et al. (2013) <sup>3</sup>        |

|    |       |        |      |      |           |                                      |
|----|-------|--------|------|------|-----------|--------------------------------------|
| 29 | 49.92 | 91.57  | 1326 | 1998 | Tree ring | Cook et al. (2013) <sup>3</sup>      |
| 30 | 47.10 | 90.97  | 1375 | 2004 | Tree ring | Cook et al. (2010) <sup>4</sup>      |
| 31 | 48.70 | 88.80  | 1565 | 2004 | Tree ring | Cook et al. (2010) <sup>4</sup>      |
| 32 | 46.32 | 101.32 | 1599 | 2001 | Tree ring | Cook et al. (2010) <sup>4</sup>      |
| 33 | 48.83 | 111.68 | 1576 | 2001 | Tree ring | Cook et al. (2010) <sup>4</sup>      |
| 34 | 48.25 | 97.40  | 1516 | 1998 | Tree ring | Cook et al. (2010) <sup>4</sup>      |
| 35 | 46.52 | 100.95 | 1340 | 2002 | Tree ring | Cook et al. (2010) <sup>4</sup>      |
| 36 | 49.37 | 94.88  | 1550 | 1997 | Tree ring | Cook et al. (2010) <sup>4</sup>      |
| 37 | 43.77 | 142.55 | 1557 | 1997 | Tree ring | Cook et al. (2013) <sup>3</sup>      |
| 38 | 43.77 | 142.55 | 1532 | 1997 | Tree ring | Cook et al. (2013) <sup>3</sup>      |
| 39 | 27.70 | 86.45  | 1417 | 1998 | Tree ring | Cook et al. (2013) <sup>3</sup>      |
| 40 | 27.73 | 86.33  | 1445 | 1998 | Tree ring | Cook et al. (2013) <sup>3</sup>      |
| 41 | 27.5  | 88.02  | 1525 | 1999 | Tree ring | Cook et al. (2013) <sup>3</sup>      |
| 42 | 27.73 | 87.20  | 1509 | 1996 | Tree ring | Cook et al. (2013) <sup>3</sup>      |
| 43 | 36.03 | 74.58  | 1240 | 1993 | Tree ring | Esper et al. (2007) <sup>8</sup>     |
| 44 | 35.33 | 74.80  | 1505 | 2005 | Tree ring | Cook et al. (2013) <sup>3</sup>      |
| 45 | 35.90 | 71.73  | 1537 | 2006 | Tree ring | Cook et al. (2013) <sup>3</sup>      |
| 46 | 35.90 | 71.73  | 1260 | 2006 | Tree ring | Cook et al. (2013) <sup>3</sup>      |
| 47 | 36.15 | 74.18  | 1497 | 2009 | Tree ring | Cook et al. (2013) <sup>3</sup>      |
| 48 | 36.15 | 74.18  | 1387 | 2005 | Tree ring | Cook et al. (2013) <sup>3</sup>      |
| 49 | 35.35 | 71.80  | 1472 | 2005 | Tree ring | Ahmed et al. (2011) <sup>9</sup>     |
| 50 | 27.37 | 99.37  | 1498 | 2007 | Tree ring | Cook et al. (2013) <sup>3</sup>      |
| 51 | 43.88 | 145.6  | 1585 | 2000 | Tree ring | Cook et al. (2010) <sup>4</sup>      |
| 52 | 48.30 | 98.93  | 46   | 1999 | Tree ring | Cook et al. (2013) <sup>3</sup>      |
| 53 | 34.78 | 100.80 | 1340 | 2002 | Tree ring | Cook et al. (2013) <sup>3</sup>      |
| 54 | 34.78 | 100.82 | 1400 | 2002 | Tree ring | Cook et al. (2013) <sup>3</sup>      |
| 55 | 30.33 | 119.43 | 1590 | 2007 | Tree ring | Cook et al. (2013) <sup>3</sup>      |
| 56 | 50.15 | 85.37  | 1581 | 1994 | Tree ring | Briffa et al. (2002) <sup>10</sup>   |
| 57 | 50.15 | 85.37  | 1581 | 1994 | Tree ring | Briffa et al. (2002) <sup>10</sup>   |
| 58 | 50.15 | 85.37  | 1581 | 1994 | Tree ring | Briffa et al. (2002) <sup>10</sup>   |
| 59 | 50.15 | 85.37  | 1581 | 1994 | Tree ring | Briffa et al. (2002) <sup>10</sup>   |
| 60 | 50.15 | 85.37  | 1581 | 1994 | Tree ring | Briffa et al. (2002) <sup>10</sup>   |
| 61 | 50.48 | 87.65  | 1581 | 1994 | Tree ring | Briffa et al. (2002) <sup>10</sup>   |
| 62 | 30.37 | 130.53 | 1080 | 2005 | Tree ring | Cook et al. (2013) <sup>3</sup>      |
| 63 | 34.63 | 104.47 | 1568 | 2006 | Tree ring | Cook et al. (2010) <sup>4</sup>      |
| 64 | 48.00 | 99.00  | 262  | 1999 | Tree ring | D'Arrigo et al. (2001) <sup>11</sup> |
| 65 | 51.03 | 143.59 | 1600 | 2004 | Tree ring | Wiles et al. (2015) <sup>12</sup>    |
| 66 | 34.00 | 103.5  | 1500 | 1995 | Tree ring | Yang et al. (2013) <sup>13</sup>     |
| 67 | 32.5  | 95.00  | 1000 | 2005 | Tree ring | Wang et al. (2015) <sup>14</sup>     |
| 68 | 43.77 | 142.55 | 1557 | 1997 | Tree ring | Davi et al. (2002) <sup>15</sup>     |
| 69 | 51.15 | 99.083 | 931  | 2005 | Tree ring | Davi et al. (2015) <sup>16</sup>     |
| 70 | 38.70 | 99.69  | 670  | 2012 | Tree ring | Zhang et al. (2014) <sup>17</sup>    |
| 71 | 37.00 | 111.50 | 1470 | 2002 | Documents | Yi et al. (2012) <sup>18</sup>       |

|     |       |        |      |      |                |                                          |
|-----|-------|--------|------|------|----------------|------------------------------------------|
| 72  | 42.00 | 80.00  | 1615 | 2005 | Tree ring      | Chen et al. (2019) <sup>19</sup>         |
| 73  | 47.10 | 88.20  | 1710 | 1983 | Tree ring      | Li (1989) <sup>20</sup>                  |
| 74  | 41.00 | 83.30  | 1807 | 1983 | Tree ring      | Li (1989) <sup>20</sup>                  |
| 75  | 41.00 | 83.30  | 1829 | 1983 | Tree ring      | Li (1989) <sup>20</sup>                  |
| 76  | 40.40 | 83.30  | 1854 | 1983 | Tree ring      | Li (1989) <sup>20</sup>                  |
| 77  | 47.20 | 89.30  | 1464 | 1981 | Tree ring      | Li (1989) <sup>20</sup>                  |
| 78  | 43.40 | 90.20  | 1550 | 1977 | Tree ring      | Li (1989) <sup>20</sup>                  |
| 79  | 43.20 | 93.20  | 1678 | 1979 | Tree ring      | Li (1989) <sup>20</sup>                  |
| 80  | 43.20 | 93.20  | 1653 | 1979 | Tree ring      | Li (1989) <sup>20</sup>                  |
| 81  | 43.50 | 93.20  | 1463 | 1979 | Tree ring      | Li (1989) <sup>20</sup>                  |
| 82  | 43.20 | 87.10  | 1752 | 1993 | Tree ring      | Li (1989) <sup>20</sup>                  |
| 83  | 43.20 | 87.10  | 1667 | 1993 | Tree ring      | Li (1989) <sup>20</sup>                  |
| 84  | 43.10 | 87.10  | 1736 | 1993 | Tree ring      | Li (1989) <sup>20</sup>                  |
| 85  | 42.50 | 81.10  | 1676 | 1982 | Tree ring      | Li (1989) <sup>20</sup>                  |
| 86  | 43.40 | 83.40  | 1687 | 1982 | Tree ring      | Li (1989) <sup>20</sup>                  |
| 87  | 35.33 | 135.73 | 1847 | 1983 | Tree ring      | Kojo (2002) <sup>21</sup>                |
| 88  | 43.77 | 142.55 | 1532 | 1997 | Tree ring      | Davi et al. (2006) <sup>22</sup>         |
| 89  | 38.13 | 128.47 | 1657 | 1998 | Tree ring      | Park et al. (2007) <sup>23</sup>         |
| 90  | 48.30 | 98.93  | 900  | 1999 | Tree ring      | Jacoby et al. (2011) <sup>24</sup>       |
| 91  | 49.92 | 91.57  | 1326 | 1998 | Tree ring      | Jacoby et al. (2003) <sup>25</sup>       |
| 92  | 47.27 | 100.03 | 1363 | 1999 | Tree ring      | Jacoby et al. (2003) <sup>26</sup>       |
| 93  | 24.5  | 121.4  | 1190 | 2007 | Tree ring      | Liu et al. (2017) <sup>27</sup>          |
| 94  | 29.64 | 94.71  | 1820 | 2008 | Reconstruction | Li et al. (2018) <sup>28</sup>           |
| 95  | 34.45 | 106.15 | 1666 | 2008 | Reconstruction | Chen & Yuan (2014) <sup>29</sup>         |
| 96  | 27.78 | 98.48  | 1678 | 2019 | Reconstruction | Deng & Li (2022) <sup>30</sup>           |
| 97  | 31.15 | 99.81  | 1383 | 2005 | Reconstruction | Li et al. (2022) <sup>31</sup>           |
| 98  | 34.65 | 75.47  | 1682 | 1981 | Tree ring      | Hughes (2002) <sup>32</sup>              |
| 99  | 51.03 | 143.59 | 1536 | 2004 | Tree ring      | Wiles et al. (2014) <sup>33</sup>        |
| 100 | 35.00 | 135.77 | 891  | 1995 | Reconstruction | Aono et al. (2019) <sup>34</sup>         |
| 101 | 35.23 | 81.46  | 1840 | 2014 | Glacier Ice    | Thompson et al. (2021) <sup>35</sup>     |
| 102 | 43.96 | 145.73 | 1585 | 2000 | Reconstruction | Demezhko & Solomina (2017) <sup>36</sup> |
| 103 | 27.42 | 90.97  | 1376 | 2013 | Reconstruction | Davi et al. (2003) <sup>37</sup>         |
| 104 | 29.63 | 79.85  | 1621 | 2008 | Tree ring      | Xu et al. (2018) <sup>38</sup>           |
| 105 | 32.75 | 76.62  | 1146 | 2006 | Tree ring      | Managave et al. (2020) <sup>39</sup>     |
| 106 | 32.22 | 77.22  | 1767 | 2008 | Tree ring      | Sano et al. (2018) <sup>40</sup>         |
| 107 | 28.18 | 85.18  | 1801 | 2000 | Tree ring      | Xu et al. (2018) <sup>41</sup>           |
| 108 | 29.85 | 81.93  | 1778 | 2000 | Tree ring      | Sano et al. (2017) <sup>42</sup>         |
| 109 | 52.23 | 104.18 | 1682 | 1998 | Tree ring      | Schleser et al. (2017) <sup>43</sup>     |
| 110 | 30.83 | 77.43  | 1801 | 1988 | Tree ring      | Borgaonkar et al. (2004) <sup>44</sup>   |
| 111 | 31.12 | 77.17  | 1775 | 1988 | Tree ring      | Borgaonkar et al. (2004) <sup>45</sup>   |
| 112 | 32.27 | 77.17  | 1676 | 1988 | Tree ring      | Borgaonkar et al. (2004) <sup>46</sup>   |
| 113 | 31.2  | 77.23  | 1685 | 1989 | Tree ring      | Borgaonkar et al. (2004) <sup>47</sup>   |
| 114 | 31.18 | 77.27  | 1673 | 1989 | Tree ring      | Borgaonkar et al. (2004) <sup>48</sup>   |

|     |       |        |      |      |           |                                         |
|-----|-------|--------|------|------|-----------|-----------------------------------------|
| 115 | 30.75 | 78.42  | 1720 | 1990 | Tree ring | Borgaonkar et al. (2004) <sup>49</sup>  |
| 116 | 30.62 | 78.75  | 1796 | 1989 | Tree ring | Borgaonkar et al. (2004) <sup>50</sup>  |
| 117 | 29.77 | 79.17  | 1657 | 1990 | Tree ring | Borgaonkar et al. (2004) <sup>51</sup>  |
| 118 | 52.80 | 106.43 | 1877 | 2004 | Tree ring | Oskolkov & Voronin (2014) <sup>52</sup> |
| 119 | 28.42 | 83.75  | 1740 | 1978 | Tree ring | Schweingruber (2002) <sup>53</sup>      |

## References

- 10 1 Panyushkina I P, Ovtchinnikov D V, Adamenko M F. Mixed response of decadal variability in larch tree-ring chronologies from upper tree-lines of the Russian Altai[J]. *Tree-ring research*, 2005, 61, 1: 33-42.
- 2 Magda V, Block J, Oidupaa, O C, et al. Extraction of the climatic signal for moisture from tree-ring chronologies of altai-sayan mountain forest-steppes[J]. *Contemporary Problems of Ecology*, 2012, 4, 7: 716-724.
- 15 3 Cook E R, Krusic P J, Anchukaitis K J, et al. Tree-ring reconstructed summer temperature anomalies for temperate East Asia since 800 CE. *Climate Dynamics*, 2013, 41: 2957-2972.
- 4 Cook E R, Anchukaitis K J, Buckley, B. M, et al. Asian Monsoon Failure and Megadrought during the Last Millennium[J]. *Science*, 2010: 328, 5977, 486-489.
- 20 5 Thompson L G, Yao, T, Mosley-Thompson, E, et al. A high-resolution millennial record of the South Asian Monsoon from Himalayan ice cores[J]. *Science*, 2000, 289, 5486, 916-1919.
- 6 Demezhko, D.Y., & Solomina, R. O. N. (2009). Ground surface temperature variations on Kunashir Island in the last 400 years inferred from borehole temperature data and tree-ring records. *Doklady Earth Sciences*, 426, 1, 628-631.
- 25 7 Yasue K, Funada R, Fukazawa K, et al. Tree-ring width and maximum density of *Picea glehnii* as indicators of climatic changes in northern Hokkaido, Japan[J]. *Canadian Journal of Forest Research*, 1997, 27, 12: 1962-1970.
- 8 Esper J, Frank D C, Wilson R J S, et al. Uniform growth trends among central Asian low and high elevation juniper tree sites[J]. *Trees-structure and Function*, 2007, 21, 2: 141-150.
- 30 9 Ahmed M, Palmer J, Khan N, et al. The dendroclimatic potential of conifers from northern Pakistan[J]. *Dendrochronologia*, 2011, 29, 2: 77-88.
- 10 Briffa K R, Osborn T J, Schweingruber F H, et al. Tree-ring width and density data around the Northern Hemisphere: Part 1, local and regional climate signals[J]. *Holocene*, 2002, 12, 6: 737-757.
- 35 11 D'Arrigo R, Jacoby G, Frank D, et al. 1738 years of mongolian temperature variability inferred from a tree-ring width chronology of siberian pine[J]. *Geophysical Research Letters*, 2001, 28, 3: 543-546.
- 12 Wiles G C, Solomina O, D'Arrigo R, et al. Reconstructed summer temperatures over the last 400 years based on larch ring widths: sakhalin island, russian far east[J]. *Climate dynamic*, 40 2015, 45: 397-405.
- 13 Yang F M, Wang N, Shi F, et al. Multi-Proxy Temperature Reconstruction from the West Qinling Mountains, China, for the Past 500 Years. *Plos One*, 2013, 8, 2: e57638.
- 14 Wang, J. L, Yang, B, Ljungqvist, F. C. A Millennial Summer Temperature Reconstruction for the Eastern Tibetan Plateau from Tree-Ring Width[J]. *Journal of Climate*, 2015, 28, 13: 45 5289-5304.

- 15 Davi N, D'Arrigo R, Jacoby G, et al. Warm-season annual to decadal temperature variability for Hokkaido, Japan, inferred from maximum latewood density (AD 1557-1990) and ring width data (AD 1532-1990)[J]. *Climatic Change*, 2002, 52: 201-217.
- 16 Davi N K, D'Arrigo R, Jacoby G, et al. A long-term context (931-2005 CE) for rapid warming over Central Asia[J]. *Quaternary Science Reviews*, 2015, 121: 89-97.
- 50 17 Zhang Y, Shao, X. M, Yin, Z. Y, et al. Millennial minimum temperature variations in the Qilian Mountains, China: evidence from tree rings[J]. *Climate of the past*, 2014, 10, 5, 1763-1778.
- 18 Yi L, Yu H J, Ge J Y, et al. Reconstructions of annual summer precipitation and temperature in north-central China since 1470 AD based on drought/flood index and tree-ring records[J]. *Climatic Change*, 2012, 110: 469-498.
- 55 19 Chen Y F, Yuan Y J, Yu S L, et al. A 391-Year Summer Temperature Reconstruction of the Tien Shan, Reveals Far-Reaching Summer Temperature Signals Over the Midlatitude Eurasian Continent. *Journal of Geophysical Research: Atmospheres*, 2019, 124, 22: 11850-11862.
- 20 Li J F. Research on dendroclimatology and dendrohydrology in Xinjiang[M], Meteorology Press, Beijing, 1989.
- 60 21 Kojo Y. (2002-04-26): NOAA/WDS Paleoclimatology-Kojo-Ashiu Locality 1-CMJA-ITR DB JAPA004. NOAA National Centers for Environmental Information. <https://doi.org/10.25921/f69c-sc66>.
- 22 Davi N K, D'Arrigo R D, Jacoby G C, et al. (2006-04-26): NOAA/WDS Paleoclimatology-Davi -Mount Asahidake, Hokkaido-PCGN-ITRDB JAPA008. NOAA National Centers for Environmental Information. <https://doi.org/10.25921/mp0w-sf19>.
- 65 23 Park W K; Seo J W; Kim Y, et al. (2007-02-07): NOAA/WDS Paleoclimatology-Park-Whachae Peak-Sorak Mountain-PIKO-ITRDB KORE001. NOAA National Centers for Environmental Information. <https://doi.org/10.25921/ensg-dr55>.
- 70 24 Jacoby G C, D'Arrigo R D, Buckley B M, et al. (2011-11-14): NOAA/WDS Paleoclimatology-Jacoby-Solongotyn Davaa (Tarvagatay Pass)-PISI-ITRDB MONG003. NOAA National Centers for Environmental Information. <https://doi.org/10.25921/v658-we82>.
- 25 Jacoby G C, D'Arrigo R D, Pederson N. (2003-11-06): NOAA/WDS Paleoclimatology-Jacoby-Khalzan Khamar-LASI-ITRDB MONG009. NOAA National Centers for Environmental Information. <https://doi.org/10.25921/fls9-jb47>.
- 75 26 Jacoby G C, D'Arrigo, R D, Pederson N. (2003-11-06): NOAA/WDS Paleoclimatology-Jacoby-Suuleen Bagtraa-LASI-ITRDB MONG010. NOAA National Centers for Environmental Information. <https://doi.org/10.25921/5384-5930>.
- 27 Liu Y, Cobb K, Song H. et al. Recent enhancement of central Pacific El Niño variability relative to last eight centuries[J]. *Nature Communication*, 2017, 8: 15386.
- 80 28 Li M Y, Duan J P, Wang L, et al. Late summer temperature reconstruction based on tree-ring density for Sygera Mountain, southeastern Tibetan Plateau[J]. *Global and Planetary Change*, 2018, 163: 10-17.
- 29 Chen F, and Yuan Y J. May-June maximum temperature reconstruction from mean earlywood density in north central China and its linkages to the summer monsoon activities[J]. *PLoS ONE*, 2014, 9(9):e107501.
- 85 30 Deng G F, Li M Q. Establishment of a Yearly September-October Mean Temperature Dataset during 1678-2019 in Northwest Yunnan Province, China[J]. *Journal of Global Change Data & Discovery*, 2022, 6(3): 330-338.

- 90 31 Li J J, Zhang Y, Shao X M, et al. Reconstruction Dataset of Yearly Mean Temperature in  
June-July at Western Sichuan Plateau of China using Tree-ring Width (1383-2005)[J/DB/OL].  
Digital Journal of Global Change Data Repository, 2022.
- 32 Hughes M K. (2002-04-26): NOAA/WDS Paleoclimatology-Hughes-Thijwas A-ABPI-IT  
RDB INDI007. NOAA National Centers for Environmental Information. [https://doi.org/  
95 10.25921/rtnv-7d91](https://doi.org/10.25921/rtnv-7d91).
- 33 Wiles G, Solomina O, D'Arrigo, R D, et al. (2014-12-16): NOAA/WDS Paleoclimatology  
-Wiles-Chamga-Skahalin Island-LAGM-ITRDB RUSS243. NOAA National Centers for  
Environmental Information. <https://doi.org/10.25921/5b03-sj94>.
- 34 Aono Y, Saito S, Kazui K. (2019-03-23): NOAA/WDS Paleoclimatology-Kyoto, Japan 1,200  
100 Year Cherry Tree Flowering Dates and March Temperature Reconstructions. NOAA National  
Centers for Environmental Information. <https://doi.org/10.25921/1xy4-ht08>.
- 35 Thompson L G, Yao T, Davis M E, et al. (2021-12-08): NOAA/WDS Paleoclimatology-Guliya  
Ice Cap, Tibetan Plateau 174 Year Stable Isotope, Major Ion and Dust Data. NOAA National  
Centers for Environmental Information. <https://doi.org/10.25921/6e2p-x626>.
- 105 36 Demezhko D Y, Solomina O. (2017-05-19): NOAA/WDS Paleoclimatology-Kunashir Island  
400 Year Temperature Reconstruction. NOAA National Centers for Environmental  
Information. <https://doi.org/10.25921/d66b-q088>.
- 37 Davi N K, D'Arrigo R D, Jacoby G C, et al. (2003-07-01): NOAA/WDS  
Paleoclimatology-Davi et al. 2001 Hokkaido, Japan Warm Season Temperature  
110 Reconstruction. NOAA National Centers for Environmental Information.  
<https://doi.org/10.25921/nq84-1274>.
- 38 Xu C, Sano M, Dimri A P, et al. (2018-04-09): NOAA/WDS Paleoclimatology-Jageshwar,  
Northern India 388 Year Tree Ring Oxygen Isotope Data. NOAA National Centers for  
Environmental Information. <https://doi.org/10.25921/jdmh-bm92>.
- 115 39 Managave S, Shimla P, Yadav R R, et al. (2020-10-03): NOAA/WDS  
Paleoclimatology-Keylong, India 860 Year Tree-Ring Oxygen Isotope Data. NOAA National  
Centers for Environmental Information. <https://doi.org/10.25921/de2r-b132>.
- 40 Sano M, Dimri A P, Ramesh R, et al. (2018-01-18): NOAA/WDS Paleoclimatology-Manali,  
NW India 242 Year Tree Ring Oxygen Isotope Data. NOAA National Centers for  
120 Environmental Information. <https://doi.org/10.25921/xxcd-4236>
- 41 Xu C, Sano M, Dimri A P, et al. (2018-04-09): NOAA/WDS Paleoclimatology-Ganesh, Nepal  
200 Year Tree Ring Oxygen Isotope Data. NOAA National Centers for Environmental  
Information. <https://doi.org/10.25921/heyh-ky04>.
- 42 Sano M, Ramesh, R, Sheshshayee, M.S, Sukumar, R. (2017-08-23): NOAA/WDS Paleo  
125 climatology-Humla, Western Nepal 223 Year Tree Ring Oxygen Isotope Data. NOAA  
National Centers for Environmental Information. <https://doi.org/10.25921/9w68-zf20>.
- 43 Schleser G H, Helle G. (2017-08-08): NOAA/WDS Paleoclimatology-Lake Baikal Regio  
n, Russia 600 Year Tree Ring Stable Isotope Data. NOAA National Centers for Envir  
onmental Information. <https://doi.org/10.25921/3mjn-9827>.
- 130 44 Borgaonkar H P, Pant G B, Rupa Kumar K. (2004-08-31): NOAA/WDS Paleoclimatolo  
gy-Borgaonkar-Tuni-PIRO-ITRDB INDI011. NOAA National Centers for Environmental  
Information. <https://doi.org/10.25921/q5bs-xp48>.
- 45 Borgaonkar H P, Pant G B, Rupa Kumar K. (2004-08-31): NOAA/WDS Paleoclimatolo

- 135 gy-Borgaonkar-Kufri-CDDE-ITRDB INDI012. NOAA National Centers for Environmental Information. <https://doi.org/10.25921/15ch-sh16>.
- 46 Borgaonkar H P, Pant G B, Rupa Kumar K. (2004-08-31): (2004-08-31): NOAA/WDS Paleoclimatology-Borgaonkar-Manali-CDDE-ITRDB INDI013. NOAA National Centers for Environmental Information. <https://doi.org/10.25921/js6k-vj79>.
- 140 47 Borgaonkar H P, Pant G B, Rupa Kumar K. (2004-08-31): NOAA/WDS Paleoclimatology-Borgaonkar-Narkhanda-CDDE-ITRDB INDI014. NOAA National Centers for Environmental Information. <https://doi.org/10.25921/y1g4-z507>.
- 48 Borgaonkar H P, Pant G B, Rupa Kumar K. (2004-08-31): NOAA/WDS Paleoclimatology-Borgaonkar-Gahan-PCSM-ITRDB INDI017. NOAA National Centers for Environmental Information. <https://doi.org/10.25921/d7gg-fe41>.
- 145 49 Borgaonkar H P, Pant G B, Rupa Kumar K. (2004-08-31): NOAA/WDS Paleoclimatology-Borgaonkar-Dhanolti-PCSM-ITRDB INDI019. NOAA National Centers for Environmental Information. <https://doi.org/10.25921/dftg-p971>.
- 50 Borgaonkar H P, Pant G B, Rupa Kumar K. (2004-08-31): NOAA/WDS Paleoclimatology-Borgaonkar-Ghansali-PIRO-ITRDB INDI020. NOAA National Centers for Environmental Information. <https://doi.org/10.25921/3gix-r006>.
- 150 51 Borgaonkar H P, Pant G B, Rupa Kumar K. (2004-08-31): NOAA/WDS Paleoclimatology-Borgaonkar-Jageswar-CDDE-ITRDB INDI021. NOAA National Centers for Environmental Information. <https://doi.org/10.25921/w7hd-8n61>.
- 52 Oskolkov V A, Voronin V I. (2021-01-28): NOAA/WDS Paleoclimatology-Oskolkov-Olkhon HAR-LASI-ITRDB RUSS289. NOAA National Centers for Environmental Information. <https://doi.org/10.25921/gtfn-bj98>.
- 155 53 Schweingruber F H. (2002-07-30): NOAA/WDS Paleoclimatology - Schweingruber - Ghorepanipass Annapurne - ABSB - ITRDB NEPA001. NOAA National Centers for Environmental Information. <https://doi.org/10.25921/3xch-zb08>.

## 2 North test results for the EOF modes

The North test was applied to assess the sampling uncertainty of the EOF eigenvalues and to determine whether the first ten EOF modes are statistically distinguishable. Tab. S2 lists the eigenvalues, explained variance, cumulative variance, associated error ranges, and the North test results for the first ten modes.

165

**Table S2: EOF decomposition and North Test results for reconstructed EA temperature during 1400-2000.**

| <b>Modes</b> | <b>Eigenvalue</b> | <b>Explained<br/>Variance (%)</b> | <b>Cumulative<br/>Variance (%)</b> | <b>Error<br/>Range</b> | <b>Passes North<br/>Test?</b> |
|--------------|-------------------|-----------------------------------|------------------------------------|------------------------|-------------------------------|
| 1            | 614.47            | 26.3%                             | 26.3%                              | 35.45                  | Yes                           |
| 2            | 260.93            | 11.2%                             | 37.5%                              | 15.05                  | Yes                           |
| 3            | 178.46            | 7.5%                              | 45.0%                              | 10.12                  | Yes                           |
| 4            | 159.07            | 6.8%                              | 51.8%                              | 9.18                   | No                            |
| 5            | 115.82            | 5.0%                              | 56.8%                              | 6.68                   | No                            |
| 6            | 92.06             | 3.9%                              | 60.7%                              | 5.31                   | No                            |
| 7            | 85.96             | 3.7%                              | 64.4%                              | 4.96                   | No                            |
| 8            | 64.59             | 2.8%                              | 67.2%                              | 3.73                   | No                            |
| 9            | 59.11             | 2.5%                              | 69.7%                              | 3.41                   | No                            |
| 10           | 44.37             | 1.9%                              | 71.6%                              | 2.56                   | No                            |
